# Supplementary material for: Expert opinion on diagnosing, treating and managing patients with cerebrotendinous xanthomatosis (CTX): a modified Delphi study
Source: PubMed Central journal article supplement (PMC8349076; doi:10.1186/s13023-021-01980-5), 2021-08-06
Supplement: 13023_2021_1980_MOESM3_ESM.pdf [file 13023_2021_1980_MOESM3_ESM.pdf]

**Supplementary Table 1. TLR search terms**

| Search Term Group                     | Number | Search Terms                                                                                        | TLR Results | TLR Update Results (Embase/MEDLINE) |
|---------------------------------------|--------|-----------------------------------------------------------------------------------------------------|-------------|-------------------------------------|
| <b>Cerebrotendinous xanthomatosis</b> | 1      | "cerebrotendinous xanthomatosis".tw.                                                                | 1368        | 765/630                             |
|                                       | 2      | (cerebr* adj (cholesterosis or cholesterinosis)).tw.                                                | 3           | 1/1                                 |
|                                       | 3      | "van Bogaert-Scherer-Epstein".tw.                                                                   | 11          | 8/5                                 |
|                                       | 4      | "Sterol 27-hydroxylase deficiency".tw.                                                              | 32          | 17/15                               |
|                                       | 5      | (Cholestanol\$ adj (lipidosis or storage)).tw.                                                      | 6           | 2/3                                 |
|                                       | 6      | (Thibaut\$ syndrome).tw.                                                                            | 3           | 1/1                                 |
|                                       | 7      | Or/1-6                                                                                              | 1383        | 772/638                             |
| <b>Exclusion terms</b>                | 8      | exp animals/ not exp humans/                                                                        | 9168178     | 4332509/4514185                     |
|                                       | 9      | ("conference abstract" or "conference review" or comment or letter or editorial).pt.                | 6236002     | 4848266/1671196                     |
|                                       | 10     | 8 or 9                                                                                              | 15034246    | 8843639/6123276                     |
| <b>Combined</b>                       | 11     | 7 not 10                                                                                            | 1178        | 610/577                             |
| <b>TLR limits</b>                     | 12     | Remove duplicates from 11                                                                           | <b>664</b>  | -                                   |
| <b>TLR update limits</b>              | 13     | Limit 11 to dd=20180510-20181113 (Embase; 10 <sup>th</sup> May 2018–13 <sup>th</sup> November 2018) | -           | <b>8</b> (Embase)                   |
|                                       |        | Limit 11 to yr=2018-current (MEDLINE; 1 <sup>st</sup> January 2018– 13 <sup>th</sup> November 2018) | -           | <b>25</b> (MEDLINE)                 |

TLR searches (rows 1–12) run on 18<sup>th</sup> May 2018. Embase 1974 to 2018 May 17, Ovid MEDLINE(R) Epub Ahead of Print, In-Process & Other Non-Indexed Citations, Ovid

MEDLINE(R) Daily and Ovid MEDLINE(R) 1946 to Present. TLR update searches (rows 1–11 and row 13) run on 13<sup>th</sup> November 2018. Embase 1974 to 2018 November 12,

Ovid MEDLINE(R) Epub Ahead of Print, In-Process & Other Non-Indexed Citations, Ovid MEDLINE(R) Daily and Ovid MEDLINE(R) 1946 to 2018 November 12. TLR: targeted

literature review.
