# Supplementary material for: Expert opinion on diagnosing, treating and managing patients with cerebrotendinous xanthomatosis (CTX): a modified Delphi study
Source: PubMed Central journal article supplement (PMC8349076; doi:10.1186/s13023-021-01980-5), 2021-08-06
Supplement: 13023_2021_1980_MOESM5_ESM.pdf [file 13023_2021_1980_MOESM5_ESM.pdf]

### Supplementary Table 3. Full-texts prioritised from the TLR to inform Delphi panel questionnaires

| Author (Year)                    | Title                                                                                                                                                            |
|----------------------------------|------------------------------------------------------------------------------------------------------------------------------------------------------------------|
| Amador <i>et al.</i> (2018)      | Treatment with chenodeoxycholic acid in cerebrotendinous xanthomatosis: clinical, neurophysiological, and quantitative brain structural outcomes                 |
| Batta <i>et al.</i> (2004)       | Hydrophilic 7 $\beta$ -hydroxy bile acids, lovastatin, and cholestyramine are ineffective in the treatment of cerebrotendinous xanthomatosis                     |
| Beppu <i>et al.</i> (1982)       | Serum bile acid profiles in cerebrotendinous xanthomatosis                                                                                                       |
| Berginer <i>et al.</i> (1982)    | EEG in cerebrotendinous xanthomatosis (CTX)                                                                                                                      |
| Berginer <i>et al.</i> (1984)    | Long-term treatment of cerebrotendinous xanthomatosis with chenodeoxycholic acid                                                                                 |
| Bleye <i>et al.</i> (2016)       | Update on newborn dried bloodspot testing for cerebrotendinous xanthomatosis: an available high-throughput liquid-chromatography tandem mass spectrometry method |
| DeBarber <i>et al.</i> (2018)    | Newborn screening for cerebrotendinous xanthomatosis is the solution for early identification and treatment                                                      |
| DeBarber <i>et al.</i> (2014)    | A blood test for cerebrotendinous xanthomatosis with potential for disease detection in newborns                                                                 |
| Duell <i>et al.</i> (2018)       | Diagnosis, treatment, and clinical outcomes in 43 cases with cerebrotendinous xanthomatosis                                                                      |
| Ginanneschi <i>et al.</i> (2013) | Polyneuropathy in cerebrotendinous xanthomatosis and response to treatment with chenodeoxycholic acid                                                            |
| Inglese <i>et al.</i> (2003)     | Quantification of brain damage in cerebrotendinous xanthomatosis with magnetization transfer MR imaging                                                          |
| Köhler <i>et al.</i> (2018)      | Adulthood leukodystrophies                                                                                                                                       |
| Mascalchi and Vella. (2018)      | Neuroimaging Applications in Chronic Ataxias                                                                                                                     |
| Mignarri <i>et al.</i> (2017)    | The spectrum of magnetic resonance findings in cerebrotendinous xanthomatosis: redefinition and evidence of new markers of disease progression                   |
| Mignarri <i>et al.</i> (2014)    | A suspicion index for early diagnosis and treatment of cerebrotendinous xanthomatosis                                                                            |

| <b>Author (Year)</b>                   | <b>Title</b>                                                                                                                                            |
|----------------------------------------|---------------------------------------------------------------------------------------------------------------------------------------------------------|
| Mignarri <i>et al.</i> (2016)          | Evaluation of cholesterol metabolism in cerebrotendinous xanthomatosis                                                                                  |
| Mignarri <i>et al.</i> (2011)          | Clinical relevance and neurophysiological correlates of spasticity in cerebrotendinous xanthomatosis                                                    |
| Nie <i>et al.</i> (2014)               | Cerebrotendinous xanthomatosis: a comprehensive review of pathogenesis, clinical manifestations, diagnosis, and management                              |
| Pilo-de-la-Fuente <i>et al.</i> (2011) | Cerebrotendinous xanthomatosis in Spain: clinical, prognostic, and genetic survey                                                                       |
| Pitt (2007)                            | High-throughput urine screening for Smith–Lemli–Opitz syndrome and cerebrotendinous xanthomatosis using negative electrospray tandem mass spectrometry  |
| Salen <i>et al.</i> (1991)             | Biochemical abnormalities in cerebrotendinous xanthomatosis                                                                                             |
| Salen and Steiner. (2017)              | Epidemiology, diagnosis, and treatment of cerebrotendinous xanthomatosis (CTX)                                                                          |
| Stelten <i>et al.</i> (2018)           | Autism spectrum disorder: an early and frequent feature in cerebrotendinous xanthomatosis                                                               |
| Stelten <i>et al.</i> (2018)           | Movement disorders in cerebrotendinous xanthomatosis                                                                                                    |
| Vaz <i>et al.</i> (2017)               | A newborn screening method for cerebrotendinous xanthomatosis using bile alcohol glucuronides and metabolite ratios                                     |
| Verrips <i>et al.</i> (2000)           | Presence of diarrhea and absence of tendon xanthomas in patients with cerebrotendinous xanthomatosis                                                    |
| Verrips <i>et al.</i> (1999)           | Effect of simvastatin in addition to chenodeoxycholic acid in patients with cerebrotendinous xanthomatosis                                              |
| Waterreus <i>et al.</i> (1987)         | Cerebrotendinous xanthomatosis (CTX): a clinical survey of the patient population in The Netherlands                                                    |
| Yahalom <i>et al.</i> (2013)           | Neurological outcome in cerebrotendinous xanthomatosis treated with chenodeoxycholic acid: early versus late diagnosis                                  |
| Zubarioglu <i>et al.</i> (2017)        | Early diagnosed cerebrotendinous xanthomatosis patients: clinical, neuroradiological characteristics and therapy results of a single center from Turkey |

CTX: Cerebrotendinous xanthomatosis; EEG: Electroencephalogram; MR: Magnetic resonance.
